# Supplementary material
Source: publisher figshare collection journal article supplement (https://acs.figshare.com/ndownloader/files/3717727)
Supplement: Supplementary file 1 [file 3717727]

 
data_mo_xp153_0m 
 
_audit_creation_method            SHELXL-97 
_chemical_name_systematic 
; 
 ? 
; 
_chemical_name_common             ? 
_chemical_melting_point           ? 
_chemical_formula_moiety          'C19 H24 N2 O'
_chemical_formula_sum 
 'C19 H24 N2 O' 
_chemical_formula_weight          296.40 
_chemical_absolute_configuration  ad
 
loop_ 
 _atom_type_symbol 
 _atom_type_description 
 _atom_type_scat_dispersion_real 
 _atom_type_scat_dispersion_imag 
 _atom_type_scat_source 
 'C'  'C'   0.0033   0.0016 
 'International Tables Vol C Tables 4.2.6.8 and 6.1.1.4' 
 'H'  'H'   0.0000   0.0000 
 'International Tables Vol C Tables 4.2.6.8 and 6.1.1.4' 
 'N'  'N'   0.0061   0.0033 
 'International Tables Vol C Tables 4.2.6.8 and 6.1.1.4' 
 'O'  'O'   0.0106   0.0060 
 'International Tables Vol C Tables 4.2.6.8 and 6.1.1.4' 
 
_symmetry_cell_setting           'Orthorhombic'
_symmetry_space_group_name_H-M   'P 21 21 21'
_symmetry_space_group_name_Hall  'P 2ac 2ab'
 
loop_ 
 _symmetry_equiv_pos_as_xyz 
 'x, y, z' 
 'x+1/2, -y+1/2, -z' 
 '-x, y+1/2, -z+1/2' 
 '-x+1/2, -y, z+1/2' 
 
_cell_length_a                    8.0376(8) 
_cell_length_b                    12.1437(13) 
_cell_length_c                    32.747(3) 
_cell_angle_alpha                 90.00 
_cell_angle_beta                  90.00 
_cell_angle_gamma                 90.00 
_cell_volume                      3196.3(6) 
_cell_formula_units_Z             8 
_cell_measurement_temperature     100(2) 
_cell_measurement_reflns_used     7767
_cell_measurement_theta_min       2.51
_cell_measurement_theta_max       27.12

_exptl_crystal_description       'block'
_exptl_crystal_colour            'colourless'
_exptl_crystal_size_max           0.56 
_exptl_crystal_size_mid           0.25 
_exptl_crystal_size_min           0.13 
_exptl_crystal_density_meas       ? 
_exptl_crystal_density_diffrn     1.232 
_exptl_crystal_density_method     'not measured' 
_exptl_crystal_F_000              1280 
_exptl_absorpt_coefficient_mu     0.076 
_exptl_absorpt_correction_type    'multi-scan' 
_exptl_absorpt_correction_T_min   0.9585 
_exptl_absorpt_correction_T_max   0.9901 
_exptl_absorpt_process_details    'sadabs' 
 
_exptl_special_details 
; 
 ? 
; 
 
_diffrn_ambient_temperature       100(2) 
_diffrn_radiation_wavelength      0.71073 
_diffrn_radiation_type            MoK\a 
_diffrn_radiation_source          'fine-focus sealed tube' 
_diffrn_radiation_monochromator   graphite 
_diffrn_measurement_device_type  'Bruker APEX-II CCD'
_diffrn_measurement_method       '\f and \w scans' 
_diffrn_detector_area_resol_mean  ? 
_diffrn_reflns_number             31806 
_diffrn_reflns_av_R_equivalents   0.0498 
_diffrn_reflns_av_sigmaI/netI     0.0462 
_diffrn_reflns_limit_h_min        -10 
_diffrn_reflns_limit_h_max        10 
_diffrn_reflns_limit_k_min        -16 
_diffrn_reflns_limit_k_max        16 
_diffrn_reflns_limit_l_min        -43 
_diffrn_reflns_limit_l_max        43 
_diffrn_reflns_theta_min          1.24 
_diffrn_reflns_theta_max          28.32 
_reflns_number_total              7963 
_reflns_number_gt                 6645 
_reflns_threshold_expression      >2sigma(I) 
 
_computing_data_collection      'Bruker APEX2'
_computing_cell_refinement      'Bruker SAINT'
_computing_data_reduction       'Bruker SAINT' 
_computing_structure_solution   'SHELXS-97 (Sheldrick, 2008)'
_computing_structure_refinement 'SHELXL-97 (Sheldrick, 2008)'
_computing_molecular_graphics   'Bruker SHELXTL'
_computing_publication_material 'Bruker SHELXTL'
 
_refine_special_details 
; 
 Refinement of F^2^ against ALL reflections.  The weighted R-factor wR and 
 goodness of fit S are based on F^2^, conventional R-factors R are based 
 on F, with F set to zero for negative F^2^. The threshold expression of 
 F^2^ > 2sigma(F^2^) is used only for calculating R-factors(gt) etc. and is 
 not relevant to the choice of reflections for refinement.  R-factors based 
 on F^2^ are statistically about twice as large as those based on F, and R- 
 factors based on ALL data will be even larger. 
; 
 
_refine_ls_structure_factor_coef  Fsqd  
_refine_ls_matrix_type            full 
_refine_ls_weighting_scheme       calc  
_refine_ls_weighting_details 
 'calc w=1/[\s^2^(Fo^2^)+(0.0653P)^2^+0.2543P] where P=(Fo^2^+2Fc^2^)/3' 
_atom_sites_solution_primary      direct 
_atom_sites_solution_secondary    difmap 
_atom_sites_solution_hydrogens    geom 
_refine_ls_hydrogen_treatment     constr 
_refine_ls_extinction_method      none 
_refine_ls_extinction_coef        ? 
_refine_ls_abs_structure_details 
 'Flack H D (1983), Acta Cryst. A39, 876-881' 
_refine_ls_abs_structure_Flack    0.1(12) 
_refine_ls_number_reflns          7963 
_refine_ls_number_parameters      405 
_refine_ls_number_restraints      0 
_refine_ls_R_factor_all           0.0601 
_refine_ls_R_factor_gt            0.0443 
_refine_ls_wR_factor_ref          0.1195 
_refine_ls_wR_factor_gt           0.1078 
_refine_ls_goodness_of_fit_ref    1.065 
_refine_ls_restrained_S_all       1.065 
_refine_ls_shift/su_max           0.001 
_refine_ls_shift/su_mean          0.000 
 
loop_ 
 _atom_site_label 
 _atom_site_type_symbol 
 _atom_site_fract_x 
 _atom_site_fract_y 
 _atom_site_fract_z 
 _atom_site_U_iso_or_equiv 
 _atom_site_adp_type 
 _atom_site_occupancy 
 _atom_site_symmetry_multiplicity 
 _atom_site_calc_flag 
 _atom_site_refinement_flags 
 _atom_site_disorder_assembly 
 _atom_site_disorder_group 
O17 O 0.83468(19) 0.43226(11) 0.80576(4) 0.0285(3) Uani 1 1 d . . . 
H17 H 0.8749 0.4959 0.8039 0.043 Uiso 1 1 calc R . . 
O17' O 0.6610(2) 0.40631(13) 0.87724(5) 0.0421(4) Uani 1 1 d . . . 
H17' H 0.6942 0.4200 0.8535 0.063 Uiso 1 1 calc R . . 
N1 N 0.7468(2) 0.23147(12) 0.68391(4) 0.0210(3) Uani 1 1 d . . . 
N4 N 1.0115(2) 0.12819(12) 0.67891(4) 0.0224(3) Uani 1 1 d . . . 
N1' N 0.7427(2) 0.08591(12) 0.95782(4) 0.0211(3) Uani 1 1 d . . . 
N4' N 0.4724(2) 0.07636(13) 0.99468(5) 0.0245(3) Uani 1 1 d . . . 
C11 C 0.4501(3) 0.15928(16) 0.60107(5) 0.0250(4) Uani 1 1 d . . . 
H11 H 0.4070 0.1000 0.5854 0.030 Uiso 1 1 calc R . . 
C12 C 0.5702(2) 0.13818(16) 0.63029(5) 0.0242(4) Uani 1 1 d . . . 
H12 H 0.6094 0.0655 0.6350 0.029 Uiso 1 1 calc R . . 
C13 C 0.6316(2) 0.22704(15) 0.65253(5) 0.0213(4) Uani 1 1 d . . . 
C3 C 0.8484(2) 0.14031(15) 0.69927(5) 0.0222(4) Uani 1 1 d . . . 
H3 H 0.7846 0.0702 0.6959 0.027 Uiso 1 1 calc R . . 
C21 C 1.1189(2) 0.22604(16) 0.68357(5) 0.0252(4) Uani 1 1 d . . . 
H21A H 1.0720 0.2875 0.6674 0.030 Uiso 1 1 calc R . . 
H21B H 1.2309 0.2093 0.6726 0.030 Uiso 1 1 calc R . . 
C20 C 1.1346(2) 0.26140(16) 0.72751(5) 0.0248(4) Uani 1 1 d . . . 
C19 C 1.2826(3) 0.28860(19) 0.74317(6) 0.0336(5) Uani 1 1 d . . . 
H19 H 1.3769 0.2781 0.7261 0.040 Uiso 1 1 calc R . . 
C18 C 1.3142(3) 0.3341(2) 0.78505(7) 0.0408(6) Uani 1 1 d . . . 
H18A H 1.2078 0.3484 0.7987 0.061 Uiso 1 1 calc R . . 
H18B H 1.3772 0.4029 0.7828 0.061 Uiso 1 1 calc R . . 
H18C H 1.3782 0.2806 0.8010 0.061 Uiso 1 1 calc R . . 
C10 C 0.3902(2) 0.26643(16) 0.59408(5) 0.0247(4) Uani 1 1 d . . . 
H10 H 0.3081 0.2786 0.5737 0.030 Uiso 1 1 calc R . . 
C9 C 0.4500(2) 0.35435(16) 0.61672(5) 0.0238(4) Uani 1 1 d . . . 
H9 H 0.4084 0.4266 0.6122 0.029 Uiso 1 1 calc R . . 
C8 C 0.5725(2) 0.33560(14) 0.64637(5) 0.0209(4) Uani 1 1 d . . . 
C2 C 0.7600(2) 0.34023(14) 0.69768(5) 0.0207(4) Uani 1 1 d . . . 
C7 C 0.6559(2) 0.40566(15) 0.67504(5) 0.0226(4) Uani 1 1 d . . . 
C6 C 0.6321(3) 0.52834(15) 0.67842(6) 0.0305(4) Uani 1 1 d . . . 
H6A H 0.7166 0.5590 0.6967 0.046 Uiso 1 1 calc R . . 
H6B H 0.5211 0.5439 0.6894 0.046 Uiso 1 1 calc R . . 
H6C H 0.6431 0.5619 0.6513 0.046 Uiso 1 1 calc R . . 
C16 C 0.8635(2) 0.36678(15) 0.73495(5) 0.0215(4) Uani 1 1 d . . . 
H16 H 0.9401 0.4288 0.7278 0.026 Uiso 1 1 calc R . . 
C15 C 0.9707(2) 0.26862(15) 0.75005(5) 0.0233(4) Uani 1 1 d . . . 
H15 H 0.9942 0.2791 0.7798 0.028 Uiso 1 1 calc R . . 
C14 C 0.8765(3) 0.16036(15) 0.74457(5) 0.0236(4) Uani 1 1 d . . . 
H14A H 0.9416 0.0990 0.7564 0.028 Uiso 1 1 calc R . . 
H14B H 0.7682 0.1641 0.7589 0.028 Uiso 1 1 calc R . . 
C5 C 0.9950(3) 0.10111(17) 0.63531(5) 0.0270(4) Uani 1 1 d . . . 
H5A H 1.1054 0.0877 0.6237 0.040 Uiso 1 1 calc R . . 
H5B H 0.9421 0.1627 0.6210 0.040 Uiso 1 1 calc R . . 
H5C H 0.9264 0.0349 0.6322 0.040 Uiso 1 1 calc R . . 
C17 C 0.7471(3) 0.40613(16) 0.76927(5) 0.0262(4) Uani 1 1 d . . . 
H17A H 0.6857 0.4721 0.7599 0.031 Uiso 1 1 calc R . . 
H17B H 0.6646 0.3477 0.7752 0.031 Uiso 1 1 calc R . . 
C11' C 1.0174(3) -0.14749(16) 0.98761(6) 0.0295(4) Uani 1 1 d . . . 
H11' H 1.0500 -0.1928 1.0099 0.035 Uiso 1 1 calc R . . 
C12' C 0.9004(3) -0.06536(16) 0.99421(5) 0.0266(4) Uani 1 1 d . . . 
H12' H 0.8539 -0.0533 1.0205 0.032 Uiso 1 1 calc R . . 
C13' C 0.8534(2) -0.00120(14) 0.96079(5) 0.0207(4) Uani 1 1 d . . . 
C3' C 0.6334(2) 0.13058(14) 0.99027(5) 0.0224(4) Uani 1 1 d . . . 
H3' H 0.6937 0.1257 1.0169 0.027 Uiso 1 1 calc R . . 
C21' C 0.3749(3) 0.07791(15) 0.95679(6) 0.0253(4) Uani 1 1 d . . . 
H21C H 0.2611 0.0510 0.9627 0.030 Uiso 1 1 calc R . . 
H21D H 0.4261 0.0265 0.9370 0.030 Uiso 1 1 calc R . . 
C20' C 0.3634(3) 0.19054(15) 0.93761(5) 0.0232(4) Uani 1 1 d . . . 
C19' C 0.2242(3) 0.22185(18) 0.91866(6) 0.0292(4) Uani 1 1 d . . . 
H19' H 0.1319 0.1731 0.9199 0.035 Uiso 1 1 calc R . . 
C18' C 0.2010(3) 0.3276(2) 0.89548(7) 0.0369(5) Uani 1 1 d . . . 
H18D H 0.3100 0.3591 0.8889 0.055 Uiso 1 1 calc R . . 
H18E H 0.1380 0.3798 0.9123 0.055 Uiso 1 1 calc R . . 
H18F H 0.1398 0.3129 0.8702 0.055 Uiso 1 1 calc R . . 
C15' C 0.5198(2) 0.25975(15) 0.93867(5) 0.0206(4) Uani 1 1 d . . . 
H15' H 0.4888 0.3384 0.9337 0.025 Uiso 1 1 calc R . . 
C16' C 0.6437(2) 0.22297(15) 0.90519(5) 0.0215(4) Uani 1 1 d . . . 
H16' H 0.5782 0.2030 0.8803 0.026 Uiso 1 1 calc R . . 
C2' C 0.7440(2) 0.12384(14) 0.91763(5) 0.0197(3) Uani 1 1 d . . . 
C7' C 0.8517(2) 0.06203(15) 0.89483(5) 0.0207(4) Uani 1 1 d . . . 
C8' C 0.9249(2) -0.01808(14) 0.92165(5) 0.0210(4) Uani 1 1 d . . . 
C9' C 1.0434(2) -0.10102(15) 0.91609(6) 0.0239(4) Uani 1 1 d . . . 
H9' H 1.0920 -0.1130 0.8900 0.029 Uiso 1 1 calc R . . 
C10' C 1.0890(3) -0.16566(16) 0.94919(6) 0.0289(4) Uani 1 1 d . . . 
H10' H 1.1691 -0.2225 0.9458 0.035 Uiso 1 1 calc R . . 
C6' C 0.8871(3) 0.07180(17) 0.84973(5) 0.0286(4) Uani 1 1 d . . . 
H6'1 H 0.8108 0.1255 0.8375 0.043 Uiso 1 1 calc R . . 
H6'2 H 0.8713 0.0000 0.8367 0.043 Uiso 1 1 calc R . . 
H6'3 H 1.0021 0.0963 0.8457 0.043 Uiso 1 1 calc R . . 
C17' C 0.7583(3) 0.31903(16) 0.89416(6) 0.0296(4) Uani 1 1 d . . . 
H17C H 0.8170 0.3453 0.9189 0.035 Uiso 1 1 calc R . . 
H17D H 0.8425 0.2945 0.8741 0.035 Uiso 1 1 calc R . . 
C14' C 0.6033(2) 0.25121(15) 0.98062(5) 0.0223(4) Uani 1 1 d . . . 
H14C H 0.7103 0.2916 0.9804 0.027 Uiso 1 1 calc R . . 
H14D H 0.5308 0.2844 1.0017 0.027 Uiso 1 1 calc R . . 
C5' C 0.4815(3) -0.03609(17) 1.01071(6) 0.0332(5) Uani 1 1 d . . . 
H5'1 H 0.5468 -0.0365 1.0360 0.050 Uiso 1 1 calc R . . 
H5'2 H 0.5348 -0.0840 0.9905 0.050 Uiso 1 1 calc R . . 
H5'3 H 0.3689 -0.0630 1.0164 0.050 Uiso 1 1 calc R . . 
 
loop_ 
 _atom_site_aniso_label 
 _atom_site_aniso_U_11 
 _atom_site_aniso_U_22 
 _atom_site_aniso_U_33 
 _atom_site_aniso_U_23 
 _atom_site_aniso_U_13 
 _atom_site_aniso_U_12 
O17 0.0373(9) 0.0269(7) 0.0212(6) -0.0021(5) 0.0020(6) -0.0047(6) 
O17' 0.0459(10) 0.0338(8) 0.0465(9) 0.0195(7) 0.0208(8) 0.0136(7) 
N1 0.0251(8) 0.0171(7) 0.0209(7) 0.0007(6) -0.0037(6) 0.0012(6) 
N4 0.0255(8) 0.0237(7) 0.0181(7) -0.0001(6) -0.0009(6) 0.0034(7) 
N1' 0.0248(8) 0.0220(7) 0.0166(7) -0.0012(5) -0.0003(6) 0.0016(7) 
N4' 0.0280(9) 0.0236(8) 0.0220(7) -0.0010(6) 0.0047(6) -0.0030(7) 
C11 0.0260(10) 0.0276(9) 0.0214(8) -0.0019(7) 0.0015(7) -0.0016(8) 
C12 0.0264(10) 0.0229(9) 0.0233(8) 0.0007(7) 0.0000(8) 0.0011(8) 
C13 0.0227(9) 0.0225(9) 0.0187(8) 0.0029(7) 0.0003(7) 0.0020(7) 
C3 0.0264(10) 0.0194(8) 0.0209(8) 0.0032(6) -0.0017(7) 0.0016(8) 
C21 0.0259(10) 0.0284(9) 0.0214(8) 0.0008(7) 0.0014(8) 0.0004(8) 
C20 0.0248(10) 0.0284(9) 0.0211(8) -0.0003(7) 0.0004(8) 0.0028(8) 
C19 0.0255(11) 0.0451(12) 0.0304(10) -0.0076(9) 0.0016(9) 0.0012(9) 
C18 0.0305(12) 0.0574(15) 0.0345(11) -0.0105(11) -0.0027(9) -0.0041(11) 
C10 0.0228(10) 0.0334(10) 0.0180(8) 0.0044(7) 0.0008(7) 0.0016(8) 
C9 0.0230(10) 0.0266(9) 0.0219(8) 0.0070(7) 0.0012(7) 0.0031(8) 
C8 0.0214(9) 0.0209(8) 0.0205(8) 0.0027(7) 0.0039(7) 0.0016(7) 
C2 0.0221(9) 0.0179(8) 0.0221(8) 0.0000(6) 0.0021(7) -0.0008(7) 
C7 0.0229(10) 0.0213(8) 0.0234(8) 0.0023(7) 0.0017(7) 0.0007(7) 
C6 0.0331(11) 0.0213(9) 0.0372(10) 0.0014(8) -0.0010(9) 0.0030(8) 
C16 0.0220(9) 0.0222(8) 0.0202(8) -0.0013(6) 0.0014(7) -0.0008(8) 
C15 0.0263(10) 0.0269(9) 0.0166(8) 0.0014(7) -0.0025(7) 0.0018(8) 
C14 0.0282(10) 0.0243(9) 0.0184(8) 0.0035(7) 0.0014(7) 0.0027(8) 
C5 0.0309(11) 0.0307(10) 0.0193(8) -0.0026(7) -0.0022(8) 0.0053(9) 
C17 0.0268(10) 0.0260(9) 0.0257(9) -0.0038(7) 0.0006(8) -0.0002(8) 
C11' 0.0395(12) 0.0229(9) 0.0261(9) 0.0026(7) -0.0085(9) 0.0008(9) 
C12' 0.0348(11) 0.0259(9) 0.0192(8) 0.0008(7) -0.0027(8) 0.0012(8) 
C13' 0.0227(9) 0.0186(8) 0.0210(8) -0.0022(6) -0.0024(7) -0.0021(7) 
C3' 0.0291(10) 0.0216(9) 0.0165(7) -0.0019(6) 0.0031(7) 0.0002(8) 
C21' 0.0242(10) 0.0235(9) 0.0281(9) -0.0058(7) 0.0046(8) -0.0035(8) 
C20' 0.0228(10) 0.0263(9) 0.0204(8) -0.0053(7) 0.0036(7) -0.0019(8) 
C19' 0.0244(10) 0.0371(11) 0.0260(9) -0.0041(8) 0.0005(8) -0.0046(9) 
C18' 0.0319(12) 0.0491(14) 0.0299(10) 0.0052(9) -0.0073(9) 0.0021(10) 
C15' 0.0213(9) 0.0213(8) 0.0192(8) -0.0009(6) 0.0002(7) 0.0016(7) 
C16' 0.0227(9) 0.0223(9) 0.0195(8) 0.0020(6) 0.0005(7) 0.0020(8) 
C2' 0.0204(9) 0.0212(8) 0.0174(8) 0.0008(6) -0.0011(7) -0.0031(7) 
C7' 0.0216(9) 0.0219(9) 0.0185(8) -0.0012(6) -0.0006(7) -0.0015(7) 
C8' 0.0232(9) 0.0195(8) 0.0203(8) -0.0015(6) -0.0018(7) -0.0028(7) 
C9' 0.0228(9) 0.0249(9) 0.0239(8) -0.0057(7) -0.0003(7) -0.0003(8) 
C10' 0.0304(11) 0.0228(9) 0.0334(10) -0.0055(8) -0.0090(8) 0.0048(8) 
C6' 0.0320(11) 0.0324(10) 0.0214(8) 0.0023(7) 0.0038(8) 0.0036(9) 
C17' 0.0277(11) 0.0259(10) 0.0350(10) 0.0073(8) 0.0085(9) 0.0023(8) 
C14' 0.0252(10) 0.0213(9) 0.0204(8) -0.0037(6) 0.0010(7) -0.0006(7) 
C5' 0.0399(13) 0.0265(10) 0.0332(10) 0.0058(8) 0.0072(9) -0.0031(9) 
 
_geom_special_details 
; 
 All esds (except the esd in the dihedral angle between two l.s. planes) 
 are estimated using the full covariance matrix.  The cell esds are taken 
 into account individually in the estimation of esds in distances, angles 
 and torsion angles; correlations between esds in cell parameters are only 
 used when they are defined by crystal symmetry.  An approximate (isotropic) 
 treatment of cell esds is used for estimating esds involving l.s. planes. 
; 
 
loop_ 
 _geom_bond_atom_site_label_1 
 _geom_bond_atom_site_label_2 
 _geom_bond_distance 
 _geom_bond_site_symmetry_2 
 _geom_bond_publ_flag 
O17 C17 1.423(2) . ? 
O17 H17 0.8400 . ? 
O17' C17' 1.429(2) . ? 
O17' H17' 0.8400 . ? 
N1 C13 1.385(2) . ? 
N1 C2 1.399(2) . ? 
N1 C3 1.465(2) . ? 
N4 C5 1.471(2) . ? 
N4 C21 1.477(2) . ? 
N4 C3 1.478(2) . ? 
N1' C13' 1.386(2) . ? 
N1' C2' 1.394(2) . ? 
N1' C3' 1.482(2) . ? 
N4' C3' 1.458(3) . ? 
N4' C5' 1.465(3) . ? 
N4' C21' 1.468(2) . ? 
C11 C12 1.383(3) . ? 
C11 C10 1.406(3) . ? 
C11 H11 0.9500 . ? 
C12 C13 1.393(3) . ? 
C12 H12 0.9500 . ? 
C13 C8 1.416(2) . ? 
C3 C14 1.520(2) . ? 
C3 H3 1.0000 . ? 
C21 C20 1.507(2) . ? 
C21 H21A 0.9900 . ? 
C21 H21B 0.9900 . ? 
C20 C19 1.337(3) . ? 
C20 C15 1.513(3) . ? 
C19 C18 1.500(3) . ? 
C19 H19 0.9500 . ? 
C18 H18A 0.9800 . ? 
C18 H18B 0.9800 . ? 
C18 H18C 0.9800 . ? 
C10 C9 1.386(3) . ? 
C10 H10 0.9500 . ? 
C9 C8 1.401(3) . ? 
C9 H9 0.9500 . ? 
C8 C7 1.434(3) . ? 
C2 C7 1.372(3) . ? 
C2 C16 1.511(2) . ? 
C7 C6 1.506(3) . ? 
C6 H6A 0.9800 . ? 
C6 H6B 0.9800 . ? 
C6 H6C 0.9800 . ? 
C16 C17 1.538(2) . ? 
C16 C15 1.552(3) . ? 
C16 H16 1.0000 . ? 
C15 C14 1.528(3) . ? 
C15 H15 1.0000 . ? 
C14 H14A 0.9900 . ? 
C14 H14B 0.9900 . ? 
C5 H5A 0.9800 . ? 
C5 H5B 0.9800 . ? 
C5 H5C 0.9800 . ? 
C17 H17A 0.9900 . ? 
C17 H17B 0.9900 . ? 
C11' C12' 1.388(3) . ? 
C11' C10' 1.401(3) . ? 
C11' H11' 0.9500 . ? 
C12' C13' 1.395(2) . ? 
C12' H12' 0.9500 . ? 
C13' C8' 1.419(2) . ? 
C3' C14' 1.518(3) . ? 
C3' H3' 1.0000 . ? 
C21' C20' 1.508(3) . ? 
C21' H21C 0.9900 . ? 
C21' H21D 0.9900 . ? 
C20' C19' 1.335(3) . ? 
C20' C15' 1.512(3) . ? 
C19' C18' 1.504(3) . ? 
C19' H19' 0.9500 . ? 
C18' H18D 0.9800 . ? 
C18' H18E 0.9800 . ? 
C18' H18F 0.9800 . ? 
C15' C14' 1.533(2) . ? 
C15' C16' 1.547(2) . ? 
C15' H15' 1.0000 . ? 
C16' C2' 1.505(3) . ? 
C16' C17' 1.529(3) . ? 
C16' H16' 1.0000 . ? 
C2' C7' 1.368(3) . ? 
C7' C8' 1.436(3) . ? 
C7' C6' 1.509(2) . ? 
C8' C9' 1.398(3) . ? 
C9' C10' 1.388(3) . ? 
C9' H9' 0.9500 . ? 
C10' H10' 0.9500 . ? 
C6' H6'1 0.9800 . ? 
C6' H6'2 0.9800 . ? 
C6' H6'3 0.9800 . ? 
C17' H17C 0.9900 . ? 
C17' H17D 0.9900 . ? 
C14' H14C 0.9900 . ? 
C14' H14D 0.9900 . ? 
C5' H5'1 0.9800 . ? 
C5' H5'2 0.9800 . ? 
C5' H5'3 0.9800 . ? 
 
loop_ 
 _geom_angle_atom_site_label_1 
 _geom_angle_atom_site_label_2 
 _geom_angle_atom_site_label_3 
 _geom_angle 
 _geom_angle_site_symmetry_1 
 _geom_angle_site_symmetry_3 
 _geom_angle_publ_flag 
C17 O17 H17 109.5 . . ? 
C17' O17' H17' 109.5 . . ? 
C13 N1 C2 109.05(14) . . ? 
C13 N1 C3 126.75(15) . . ? 
C2 N1 C3 124.09(15) . . ? 
C5 N4 C21 109.44(14) . . ? 
C5 N4 C3 112.35(15) . . ? 
C21 N4 C3 113.06(14) . . ? 
C13' N1' C2' 108.27(14) . . ? 
C13' N1' C3' 127.58(14) . . ? 
C2' N1' C3' 124.08(15) . . ? 
C3' N4' C5' 114.35(16) . . ? 
C3' N4' C21' 112.60(14) . . ? 
C5' N4' C21' 109.95(15) . . ? 
C12 C11 C10 121.53(18) . . ? 
C12 C11 H11 119.2 . . ? 
C10 C11 H11 119.2 . . ? 
C11 C12 C13 117.76(17) . . ? 
C11 C12 H12 121.1 . . ? 
C13 C12 H12 121.1 . . ? 
N1 C13 C12 130.97(16) . . ? 
N1 C13 C8 107.11(15) . . ? 
C12 C13 C8 121.87(17) . . ? 
N1 C3 N4 114.49(14) . . ? 
N1 C3 C14 107.27(15) . . ? 
N4 C3 C14 108.94(15) . . ? 
N1 C3 H3 108.7 . . ? 
N4 C3 H3 108.7 . . ? 
C14 C3 H3 108.7 . . ? 
N4 C21 C20 112.15(15) . . ? 
N4 C21 H21A 109.2 . . ? 
C20 C21 H21A 109.2 . . ? 
N4 C21 H21B 109.2 . . ? 
C20 C21 H21B 109.2 . . ? 
H21A C21 H21B 107.9 . . ? 
C19 C20 C21 120.75(18) . . ? 
C19 C20 C15 125.01(17) . . ? 
C21 C20 C15 114.16(16) . . ? 
C20 C19 C18 126.3(2) . . ? 
C20 C19 H19 116.8 . . ? 
C18 C19 H19 116.8 . . ? 
C19 C18 H18A 109.5 . . ? 
C19 C18 H18B 109.5 . . ? 
H18A C18 H18B 109.5 . . ? 
C19 C18 H18C 109.5 . . ? 
H18A C18 H18C 109.5 . . ? 
H18B C18 H18C 109.5 . . ? 
C9 C10 C11 120.49(17) . . ? 
C9 C10 H10 119.8 . . ? 
C11 C10 H10 119.8 . . ? 
C10 C9 C8 119.28(17) . . ? 
C10 C9 H9 120.4 . . ? 
C8 C9 H9 120.4 . . ? 
C9 C8 C13 119.07(17) . . ? 
C9 C8 C7 133.31(17) . . ? 
C13 C8 C7 107.59(16) . . ? 
C7 C2 N1 109.05(16) . . ? 
C7 C2 C16 130.42(16) . . ? 
N1 C2 C16 120.20(15) . . ? 
C2 C7 C8 107.19(16) . . ? 
C2 C7 C6 127.64(17) . . ? 
C8 C7 C6 125.16(17) . . ? 
C7 C6 H6A 109.5 . . ? 
C7 C6 H6B 109.5 . . ? 
H6A C6 H6B 109.5 . . ? 
C7 C6 H6C 109.5 . . ? 
H6A C6 H6C 109.5 . . ? 
H6B C6 H6C 109.5 . . ? 
C2 C16 C17 108.78(15) . . ? 
C2 C16 C15 113.51(14) . . ? 
C17 C16 C15 110.07(14) . . ? 
C2 C16 H16 108.1 . . ? 
C17 C16 H16 108.1 . . ? 
C15 C16 H16 108.1 . . ? 
C20 C15 C14 108.93(15) . . ? 
C20 C15 C16 111.88(15) . . ? 
C14 C15 C16 110.40(15) . . ? 
C20 C15 H15 108.5 . . ? 
C14 C15 H15 108.5 . . ? 
C16 C15 H15 108.5 . . ? 
C3 C14 C15 109.04(14) . . ? 
C3 C14 H14A 109.9 . . ? 
C15 C14 H14A 109.9 . . ? 
C3 C14 H14B 109.9 . . ? 
C15 C14 H14B 109.9 . . ? 
H14A C14 H14B 108.3 . . ? 
N4 C5 H5A 109.5 . . ? 
N4 C5 H5B 109.5 . . ? 
H5A C5 H5B 109.5 . . ? 
N4 C5 H5C 109.5 . . ? 
H5A C5 H5C 109.5 . . ? 
H5B C5 H5C 109.5 . . ? 
O17 C17 C16 112.49(16) . . ? 
O17 C17 H17A 109.1 . . ? 
C16 C17 H17A 109.1 . . ? 
O17 C17 H17B 109.1 . . ? 
C16 C17 H17B 109.1 . . ? 
H17A C17 H17B 107.8 . . ? 
C12' C11' C10' 122.09(17) . . ? 
C12' C11' H11' 119.0 . . ? 
C10' C11' H11' 119.0 . . ? 
C11' C12' C13' 117.55(17) . . ? 
C11' C12' H12' 121.2 . . ? 
C13' C12' H12' 121.2 . . ? 
N1' C13' C12' 130.92(17) . . ? 
N1' C13' C8' 107.85(15) . . ? 
C12' C13' C8' 121.21(17) . . ? 
N4' C3' N1' 115.58(14) . . ? 
N4' C3' C14' 108.37(15) . . ? 
N1' C3' C14' 107.36(14) . . ? 
N4' C3' H3' 108.4 . . ? 
N1' C3' H3' 108.4 . . ? 
C14' C3' H3' 108.4 . . ? 
N4' C21' C20' 113.34(15) . . ? 
N4' C21' H21C 108.9 . . ? 
C20' C21' H21C 108.9 . . ? 
N4' C21' H21D 108.9 . . ? 
C20' C21' H21D 108.9 . . ? 
H21C C21' H21D 107.7 . . ? 
C19' C20' C21' 120.22(19) . . ? 
C19' C20' C15' 123.29(18) . . ? 
C21' C20' C15' 116.35(17) . . ? 
C20' C19' C18' 125.6(2) . . ? 
C20' C19' H19' 117.2 . . ? 
C18' C19' H19' 117.2 . . ? 
C19' C18' H18D 109.5 . . ? 
C19' C18' H18E 109.5 . . ? 
H18D C18' H18E 109.5 . . ? 
C19' C18' H18F 109.5 . . ? 
H18D C18' H18F 109.5 . . ? 
H18E C18' H18F 109.5 . . ? 
C20' C15' C14' 110.31(14) . . ? 
C20' C15' C16' 110.99(14) . . ? 
C14' C15' C16' 109.49(15) . . ? 
C20' C15' H15' 108.7 . . ? 
C14' C15' H15' 108.7 . . ? 
C16' C15' H15' 108.7 . . ? 
C2' C16' C17' 110.57(16) . . ? 
C2' C16' C15' 112.58(14) . . ? 
C17' C16' C15' 109.56(15) . . ? 
C2' C16' H16' 108.0 . . ? 
C17' C16' H16' 108.0 . . ? 
C15' C16' H16' 108.0 . . ? 
C7' C2' N1' 109.81(16) . . ? 
C7' C2' C16' 129.07(16) . . ? 
N1' C2' C16' 121.04(15) . . ? 
C2' C7' C8' 107.28(15) . . ? 
C2' C7' C6' 127.63(17) . . ? 
C8' C7' C6' 125.08(17) . . ? 
C9' C8' C13' 119.82(16) . . ? 
C9' C8' C7' 133.40(17) . . ? 
C13' C8' C7' 106.78(16) . . ? 
C10' C9' C8' 119.06(17) . . ? 
C10' C9' H9' 120.5 . . ? 
C8' C9' H9' 120.5 . . ? 
C9' C10' C11' 120.26(18) . . ? 
C9' C10' H10' 119.9 . . ? 
C11' C10' H10' 119.9 . . ? 
C7' C6' H6'1 109.5 . . ? 
C7' C6' H6'2 109.5 . . ? 
H6'1 C6' H6'2 109.5 . . ? 
C7' C6' H6'3 109.5 . . ? 
H6'1 C6' H6'3 109.5 . . ? 
H6'2 C6' H6'3 109.5 . . ? 
O17' C17' C16' 109.15(17) . . ? 
O17' C17' H17C 109.8 . . ? 
C16' C17' H17C 109.8 . . ? 
O17' C17' H17D 109.8 . . ? 
C16' C17' H17D 109.8 . . ? 
H17C C17' H17D 108.3 . . ? 
C3' C14' C15' 108.76(14) . . ? 
C3' C14' H14C 109.9 . . ? 
C15' C14' H14C 109.9 . . ? 
C3' C14' H14D 109.9 . . ? 
C15' C14' H14D 109.9 . . ? 
H14C C14' H14D 108.3 . . ? 
N4' C5' H5'1 109.5 . . ? 
N4' C5' H5'2 109.5 . . ? 
H5'1 C5' H5'2 109.5 . . ? 
N4' C5' H5'3 109.5 . . ? 
H5'1 C5' H5'3 109.5 . . ? 
H5'2 C5' H5'3 109.5 . . ? 
 
loop_ 
 _geom_torsion_atom_site_label_1 
 _geom_torsion_atom_site_label_2 
 _geom_torsion_atom_site_label_3 
 _geom_torsion_atom_site_label_4 
 _geom_torsion 
 _geom_torsion_site_symmetry_1 
 _geom_torsion_site_symmetry_2 
 _geom_torsion_site_symmetry_3 
 _geom_torsion_site_symmetry_4 
 _geom_torsion_publ_flag 
C10 C11 C12 C13 -0.5(3) . . . . ? 
C2 N1 C13 C12 -176.89(19) . . . . ? 
C3 N1 C13 C12 6.7(3) . . . . ? 
C2 N1 C13 C8 0.4(2) . . . . ? 
C3 N1 C13 C8 -176.00(17) . . . . ? 
C11 C12 C13 N1 178.10(18) . . . . ? 
C11 C12 C13 C8 1.1(3) . . . . ? 
C13 N1 C3 N4 90.5(2) . . . . ? 
C2 N1 C3 N4 -85.4(2) . . . . ? 
C13 N1 C3 C14 -148.50(18) . . . . ? 
C2 N1 C3 C14 35.6(2) . . . . ? 
C5 N4 C3 N1 -63.75(19) . . . . ? 
C21 N4 C3 N1 60.74(19) . . . . ? 
C5 N4 C3 C14 176.18(15) . . . . ? 
C21 N4 C3 C14 -59.34(18) . . . . ? 
C5 N4 C21 C20 177.37(16) . . . . ? 
C3 N4 C21 C20 51.3(2) . . . . ? 
N4 C21 C20 C19 135.3(2) . . . . ? 
N4 C21 C20 C15 -47.9(2) . . . . ? 
C21 C20 C19 C18 174.5(2) . . . . ? 
C15 C20 C19 C18 -1.9(4) . . . . ? 
C12 C11 C10 C9 -0.4(3) . . . . ? 
C11 C10 C9 C8 0.8(3) . . . . ? 
C10 C9 C8 C13 -0.2(3) . . . . ? 
C10 C9 C8 C7 -178.14(19) . . . . ? 
N1 C13 C8 C9 -178.37(16) . . . . ? 
C12 C13 C8 C9 -0.8(3) . . . . ? 
N1 C13 C8 C7 0.1(2) . . . . ? 
C12 C13 C8 C7 177.67(17) . . . . ? 
C13 N1 C2 C7 -0.8(2) . . . . ? 
C3 N1 C2 C7 175.77(16) . . . . ? 
C13 N1 C2 C16 173.33(16) . . . . ? 
C3 N1 C2 C16 -10.1(3) . . . . ? 
N1 C2 C7 C8 0.8(2) . . . . ? 
C16 C2 C7 C8 -172.52(18) . . . . ? 
N1 C2 C7 C6 -178.47(19) . . . . ? 
C16 C2 C7 C6 8.2(3) . . . . ? 
C9 C8 C7 C2 177.6(2) . . . . ? 
C13 C8 C7 C2 -0.5(2) . . . . ? 
C9 C8 C7 C6 -3.1(3) . . . . ? 
C13 C8 C7 C6 178.76(18) . . . . ? 
C7 C2 C16 C17 59.6(3) . . . . ? 
N1 C2 C16 C17 -113.07(18) . . . . ? 
C7 C2 C16 C15 -177.49(18) . . . . ? 
N1 C2 C16 C15 9.8(2) . . . . ? 
C19 C20 C15 C14 -131.4(2) . . . . ? 
C21 C20 C15 C14 52.0(2) . . . . ? 
C19 C20 C15 C16 106.3(2) . . . . ? 
C21 C20 C15 C16 -70.4(2) . . . . ? 
C2 C16 C15 C20 84.89(19) . . . . ? 
C17 C16 C15 C20 -152.92(15) . . . . ? 
C2 C16 C15 C14 -36.6(2) . . . . ? 
C17 C16 C15 C14 85.59(18) . . . . ? 
N1 C3 C14 C15 -61.5(2) . . . . ? 
N4 C3 C14 C15 62.96(19) . . . . ? 
C20 C15 C14 C3 -58.91(19) . . . . ? 
C16 C15 C14 C3 64.31(19) . . . . ? 
C2 C16 C17 O17 179.58(14) . . . . ? 
C15 C16 C17 O17 54.6(2) . . . . ? 
C10' C11' C12' C13' 0.9(3) . . . . ? 
C2' N1' C13' C12' 178.3(2) . . . . ? 
C3' N1' C13' C12' -4.3(3) . . . . ? 
C2' N1' C13' C8' -0.2(2) . . . . ? 
C3' N1' C13' C8' 177.16(16) . . . . ? 
C11' C12' C13' N1' -179.38(19) . . . . ? 
C11' C12' C13' C8' -1.0(3) . . . . ? 
C5' N4' C3' N1' 69.2(2) . . . . ? 
C21' N4' C3' N1' -57.3(2) . . . . ? 
C5' N4' C3' C14' -170.30(15) . . . . ? 
C21' N4' C3' C14' 63.26(18) . . . . ? 
C13' N1' C3' N4' -86.4(2) . . . . ? 
C2' N1' C3' N4' 90.6(2) . . . . ? 
C13' N1' C3' C14' 152.59(17) . . . . ? 
C2' N1' C3' C14' -30.5(2) . . . . ? 
C3' N4' C21' C20' -49.6(2) . . . . ? 
C5' N4' C21' C20' -178.42(16) . . . . ? 
N4' C21' C20' C19' -144.40(18) . . . . ? 
N4' C21' C20' C15' 39.8(2) . . . . ? 
C21' C20' C19' C18' -174.84(18) . . . . ? 
C15' C20' C19' C18' 0.7(3) . . . . ? 
C19' C20' C15' C14' 141.42(18) . . . . ? 
C21' C20' C15' C14' -42.9(2) . . . . ? 
C19' C20' C15' C16' -97.0(2) . . . . ? 
C21' C20' C15' C16' 78.63(18) . . . . ? 
C20' C15' C16' C2' -81.28(19) . . . . ? 
C14' C15' C16' C2' 40.7(2) . . . . ? 
C20' C15' C16' C17' 155.24(15) . . . . ? 
C14' C15' C16' C17' -82.75(18) . . . . ? 
C13' N1' C2' C7' 0.7(2) . . . . ? 
C3' N1' C2' C7' -176.75(16) . . . . ? 
C13' N1' C2' C16' -176.29(16) . . . . ? 
C3' N1' C2' C16' 6.3(3) . . . . ? 
C17' C16' C2' C7' -64.5(2) . . . . ? 
C15' C16' C2' C7' 172.58(18) . . . . ? 
C17' C16' C2' N1' 111.82(19) . . . . ? 
C15' C16' C2' N1' -11.1(2) . . . . ? 
N1' C2' C7' C8' -0.9(2) . . . . ? 
C16' C2' C7' C8' 175.74(18) . . . . ? 
N1' C2' C7' C6' 177.65(18) . . . . ? 
C16' C2' C7' C6' -5.7(3) . . . . ? 
N1' C13' C8' C9' 179.29(16) . . . . ? 
C12' C13' C8' C9' 0.6(3) . . . . ? 
N1' C13' C8' C7' -0.4(2) . . . . ? 
C12' C13' C8' C7' -179.07(18) . . . . ? 
C2' C7' C8' C9' -178.8(2) . . . . ? 
C6' C7' C8' C9' 2.6(3) . . . . ? 
C2' C7' C8' C13' 0.8(2) . . . . ? 
C6' C7' C8' C13' -177.81(17) . . . . ? 
C13' C8' C9' C10' 0.0(3) . . . . ? 
C7' C8' C9' C10' 179.6(2) . . . . ? 
C8' C9' C10' C11' -0.2(3) . . . . ? 
C12' C11' C10' C9' -0.2(3) . . . . ? 
C2' C16' C17' O17' 172.16(15) . . . . ? 
C15' C16' C17' O17' -63.20(19) . . . . ? 
N4' C3' C14' C15' -65.66(18) . . . . ? 
N1' C3' C14' C15' 59.84(19) . . . . ? 
C20' C15' C14' C3' 54.87(19) . . . . ? 
C16' C15' C14' C3' -67.55(19) . . . . ? 
 
loop_ 
 _geom_hbond_atom_site_label_D 
 _geom_hbond_atom_site_label_H 
 _geom_hbond_atom_site_label_A 
 _geom_hbond_distance_DH 
 _geom_hbond_distance_HA 
 _geom_hbond_distance_DA 
 _geom_hbond_angle_DHA 
 _geom_hbond_site_symmetry_A 
O17 H17 N4  0.84 1.93 2.728(2) 157.7 3_756 
O17' H17' O17  0.84 1.93 2.743(2) 161.8 . 
 
_diffrn_measured_fraction_theta_max    0.999 
_diffrn_reflns_theta_full              28.32 
_diffrn_measured_fraction_theta_full   0.999 
_refine_diff_density_max    0.266 
_refine_diff_density_min   -0.187 
_refine_diff_density_rms    0.048 
